# Supplementary material
Source: MDPI journal article supplement (https://www.mdpi.com/2220-9964/11/9/470)
Supplement: s1 [file s1 › ijgi-1862792-supplementary.pdf]

**Supplementary Table S1: Spatial features**

| <b>Feature</b>                                   | <b>Source</b>                                                                       | <b>Description</b>                                                                                                                                              |
|--------------------------------------------------|-------------------------------------------------------------------------------------|-----------------------------------------------------------------------------------------------------------------------------------------------------------------|
| Latitude & longitude                             | USA shape files                                                                     | Geographical coordinates of counties                                                                                                                            |
| Female obesity prevalence                        | <a href="http://ghdx.healthdata.org/us-data">http://ghdx.healthdata.org/us-data</a> | Female obesity prevalence 2011 (%)                                                                                                                              |
| Male obesity prevalence                          | <a href="http://ghdx.healthdata.org/us-data">http://ghdx.healthdata.org/us-data</a> | Male obesity prevalence 2011 (%)                                                                                                                                |
| Female anyPA prevalence                          | <a href="http://ghdx.healthdata.org/us-data">http://ghdx.healthdata.org/us-data</a> | Prevalence 2011 (%)                                                                                                                                             |
| Male anyPA prevalence                            | <a href="http://ghdx.healthdata.org/us-data">http://ghdx.healthdata.org/us-data</a> | Prevalence 2011 (%)                                                                                                                                             |
| Female sufficientPA prevalence                   | <a href="http://ghdx.healthdata.org/us-data">http://ghdx.healthdata.org/us-data</a> | Female sufficientPA Prevalence 2011 (%)                                                                                                                         |
| Male sufficientPA prevalence                     | <a href="http://ghdx.healthdata.org/us-data">http://ghdx.healthdata.org/us-data</a> | Male sufficientPA Prevalence 2011 (%)                                                                                                                           |
| Cardiovascular disease mortality                 | <a href="http://ghdx.healthdata.org/us-data">http://ghdx.healthdata.org/us-data</a> | Mortality rate 2014                                                                                                                                             |
| Cancer mortality                                 | <a href="http://ghdx.healthdata.org/us-data">http://ghdx.healthdata.org/us-data</a> | Mortality rate 2014                                                                                                                                             |
| Respiratory disease mortality                    | <a href="http://ghdx.healthdata.org/us-data">http://ghdx.healthdata.org/us-data</a> | Mortality rate 2014                                                                                                                                             |
| Life expectancy                                  | <a href="http://ghdx.healthdata.org/us-data">http://ghdx.healthdata.org/us-data</a> | 2014                                                                                                                                                            |
| Male hypertension prevalence (%)                 | <a href="http://ghdx.healthdata.org/us-data">http://ghdx.healthdata.org/us-data</a> | total hypertension prevalence (among all respondents, percentage of those who reported systolic BP of at least 140mm HG and/or self-reported taking medication) |
| Female hypertension prevalence (%)               | <a href="http://ghdx.healthdata.org/us-data">http://ghdx.healthdata.org/us-data</a> | total hypertension prevalence (among all respondents, percentage of those who reported systolic BP of at least 140mm HG and/or self-reported taking medication) |
| Male hypertension prevalence self-reported (%)   | <a href="http://ghdx.healthdata.org/us-data">http://ghdx.healthdata.org/us-data</a> | percentage of respondents who reported being told by a doctor or other healthcare professional that they had hypertension                                       |
| Female hypertension prevalence self-reported (%) | <a href="http://ghdx.healthdata.org/us-data">http://ghdx.healthdata.org/us-data</a> | percentage of respondents who reported being told by a doctor or other healthcare professional that they had hypertension                                       |
| Male hypertension prevalence treatment (%)       | <a href="http://ghdx.healthdata.org/us-data">http://ghdx.healthdata.org/us-data</a> | among prevalent cases, those who report taking prescribed medication                                                                                            |
| Female hypertension prevalence treatment (%)     | <a href="http://ghdx.healthdata.org/us-data">http://ghdx.healthdata.org/us-data</a> | among prevalent cases, those who report taking prescribed medication                                                                                            |
| Male hypertension prevalence control (%)         | <a href="http://ghdx.healthdata.org/us-data">http://ghdx.healthdata.org/us-data</a> | among prevalent cases, the percentage of respondents who reported taking prescribed medication and SBP <140 mm Hg                                               |
| Female hypertension prevalence control (%)       | <a href="http://ghdx.healthdata.org/us-data">http://ghdx.healthdata.org/us-data</a> | among prevalent cases, the percentage of respondents who reported taking prescribed medication and SBP <140 mm Hg                                               |

|                                                 |                                                                                         |                                                                                                                                                          |
|-------------------------------------------------|-----------------------------------------------------------------------------------------|----------------------------------------------------------------------------------------------------------------------------------------------------------|
| Male hypertension prevalence uncontrolled (%)   | <a href="http://ghdx.healthdata.org/us-data">http://ghdx.healthdata.org/us-data</a>     | percentage of respondents who reported being told by a doctor or other healthcare professional that they had hypertension and SBP of 140 mm Hg or higher |
| Female hypertension prevalence uncontrolled (%) | <a href="http://ghdx.healthdata.org/us-data">http://ghdx.healthdata.org/us-data</a>     | percentage of respondents who reported being told by a doctor or other healthcare professional that they had hypertension and SBP of 140 mm Hg or higher |
| Male hypertension prevalence awareness (%)      | <a href="http://ghdx.healthdata.org/us-data">http://ghdx.healthdata.org/us-data</a>     | among prevalent cases, the percentage of people who have hypertension and know it                                                                        |
| Female hypertension prevalence awareness (%)    | <a href="http://ghdx.healthdata.org/us-data">http://ghdx.healthdata.org/us-data</a>     | among prevalent cases, the percentage of people who have hypertension and know it                                                                        |
| Direct purchase only - Pop 19-34                | <a href="https://covid19.census.gov/datasets/">https://covid19.census.gov/datasets/</a> | Number of Population                                                                                                                                     |
| Direct purchase only - Pop 35-64                | <a href="https://covid19.census.gov/datasets/">https://covid19.census.gov/datasets/</a> | Number of Population                                                                                                                                     |
| Direct purchase only - Pop 65+                  | <a href="https://covid19.census.gov/datasets/">https://covid19.census.gov/datasets/</a> | Number of Population                                                                                                                                     |
| Medicare only - Pop < 19                        | <a href="https://covid19.census.gov/datasets/">https://covid19.census.gov/datasets/</a> | Number of Population                                                                                                                                     |
| Medicare only - Pop 19-34                       | <a href="https://covid19.census.gov/datasets/">https://covid19.census.gov/datasets/</a> | Number of Population                                                                                                                                     |
| Medicare only - Pop 35-64                       | <a href="https://covid19.census.gov/datasets/">https://covid19.census.gov/datasets/</a> | Number of Population                                                                                                                                     |
| Medicare only - Pop 65+                         | <a href="https://covid19.census.gov/datasets/">https://covid19.census.gov/datasets/</a> | Number of Population                                                                                                                                     |
| Medicaid only - Pop < 19                        | <a href="https://covid19.census.gov/datasets/">https://covid19.census.gov/datasets/</a> | Number of Population                                                                                                                                     |
| Medicaid only - Pop 19-34                       | <a href="https://covid19.census.gov/datasets/">https://covid19.census.gov/datasets/</a> | Number of Population                                                                                                                                     |
| Medicaid only - Pop 35-64                       | <a href="https://covid19.census.gov/datasets/">https://covid19.census.gov/datasets/</a> | Number of Population                                                                                                                                     |
| TRICARE/Military only: - Pop < 19               | <a href="https://covid19.census.gov/datasets/">https://covid19.census.gov/datasets/</a> | Number of Population                                                                                                                                     |
| TRICARE/Military only: - Pop 19-34              | <a href="https://covid19.census.gov/datasets/">https://covid19.census.gov/datasets/</a> | Number of Population                                                                                                                                     |
| TRICARE/Military only: - Pop 35-64              | <a href="https://covid19.census.gov/datasets/">https://covid19.census.gov/datasets/</a> | Number of Population                                                                                                                                     |
| TRICARE/Military only: - Pop 65+                | <a href="https://covid19.census.gov/datasets/">https://covid19.census.gov/datasets/</a> | Number of Population                                                                                                                                     |
| VA health care only - Pop < 19                  | <a href="https://covid19.census.gov/datasets/">https://covid19.census.gov/datasets/</a> | Number of Population                                                                                                                                     |
| VA health care only - Pop 19-34                 | <a href="https://covid19.census.gov/datasets/">https://covid19.census.gov/datasets/</a> | Number of Population                                                                                                                                     |
| VA health care only - Pop 35-64                 | <a href="https://covid19.census.gov/datasets/">https://covid19.census.gov/datasets/</a> | Number of Population                                                                                                                                     |
| VA health care only - Pop 65+                   | <a href="https://covid19.census.gov/datasets/">https://covid19.census.gov/datasets/</a> | Number of Population                                                                                                                                     |
| 2 or more insurance - Pop < 19                  | <a href="https://covid19.census.gov/datasets/">https://covid19.census.gov/datasets/</a> | Number of Population                                                                                                                                     |
| 2 or more insurance - Pop 19-34                 | <a href="https://covid19.census.gov/datasets/">https://covid19.census.gov/datasets/</a> | Number of Population                                                                                                                                     |
| 2 or more insurance - Pop 35-64                 | <a href="https://covid19.census.gov/datasets/">https://covid19.census.gov/datasets/</a> | Number of Population                                                                                                                                     |
| 2 or more insurance - Pop 65+                   | <a href="https://covid19.census.gov/datasets/">https://covid19.census.gov/datasets/</a> | Number of Population                                                                                                                                     |
| Population with no health insurance - 0-18      | <a href="https://covid19.census.gov/datasets/">https://covid19.census.gov/datasets/</a> | Number of Population                                                                                                                                     |

|                                                                                     |                                                                                                                                                                         |                            |
|-------------------------------------------------------------------------------------|-------------------------------------------------------------------------------------------------------------------------------------------------------------------------|----------------------------|
| Population with no health insurance - 19-34                                         | <a href="https://covid19.census.gov/datasets/">https://covid19.census.gov/datasets/</a>                                                                                 | Number of Population       |
| Population with no health insurance - 35-64                                         | <a href="https://covid19.census.gov/datasets/">https://covid19.census.gov/datasets/</a>                                                                                 | Number of Population       |
| Population with no health insurance - Age 65+                                       | <a href="https://covid19.census.gov/datasets/">https://covid19.census.gov/datasets/</a>                                                                                 | Number of Population       |
| Civilian noninstitutionalized pop - With health coverage                            | <a href="https://covid19.census.gov/datasets/">https://covid19.census.gov/datasets/</a>                                                                                 | Number of Population       |
| Total civilian noninstitutionalized pop - With health insurance coverage            | <a href="https://covid19.census.gov/datasets/">https://covid19.census.gov/datasets/</a>                                                                                 | Number of Population       |
| Total civilian noninstitutionalized pop - With private health insurance             | <a href="https://covid19.census.gov/datasets/">https://covid19.census.gov/datasets/</a>                                                                                 | Number of Population       |
| Total civilian noninstitutionalized pop - With public coverage                      | <a href="https://covid19.census.gov/datasets/">https://covid19.census.gov/datasets/</a>                                                                                 | Number of Population       |
| Total civilian noninstitutionalized pop - No health insurance coverage              | <a href="https://covid19.census.gov/datasets/">https://covid19.census.gov/datasets/</a>                                                                                 | Number of Population       |
| Civilian noninstitutionalized pop under 19 yrs                                      | <a href="https://covid19.census.gov/datasets/">https://covid19.census.gov/datasets/</a>                                                                                 | Number of Population       |
| Total civilian noninstitutionalized pop under 19 yrs - No health insurance coverage | <a href="https://covid19.census.gov/datasets/">https://covid19.census.gov/datasets/</a>                                                                                 | Number of Population       |
| Total civilian noninstitutionalized pop - with a disability                         | <a href="https://covid19.census.gov/datasets/">https://covid19.census.gov/datasets/</a>                                                                                 | Number of Population       |
| Total civilian noninstitutionalized pop - with a disability 65 and over             | <a href="https://covid19.census.gov/datasets/">https://covid19.census.gov/datasets/</a>                                                                                 | Number of Population       |
| Total households with a computer                                                    | <a href="https://covid19.census.gov/datasets/">https://covid19.census.gov/datasets/</a>                                                                                 | Number of total households |
| Total households with a broadband Internet subscription                             | <a href="https://covid19.census.gov/datasets/">https://covid19.census.gov/datasets/</a>                                                                                 | Number of total households |
| Less than a high school diploma                                                     | <a href="https://www.ers.usda.gov/data-products/county-level-data-sets/download-data/">https://www.ers.usda.gov/data-products/county-level-data-sets/download-data/</a> | Percent of adults, 2014-18 |
| High school diploma only                                                            | <a href="https://www.ers.usda.gov/data-products/county-level-data-sets/download-data/">https://www.ers.usda.gov/data-products/county-level-data-sets/download-data/</a> | Percent of adults, 2014-19 |
| Some college or associate's degree                                                  | <a href="https://www.ers.usda.gov/data-products/county-level-data-sets/download-data/">https://www.ers.usda.gov/data-products/county-level-data-sets/download-data/</a> | Percent of adults, 2014-20 |
| Bachelor's degree or higher                                                         | <a href="https://www.ers.usda.gov/data-products/county-level-data-sets/download-data/">https://www.ers.usda.gov/data-products/county-level-data-sets/download-data/</a> | Percent of adults, 2014-21 |

|                            |                                                                                                                                                                         |                                                                                                                                                                                                                                              |
|----------------------------|-------------------------------------------------------------------------------------------------------------------------------------------------------------------------|----------------------------------------------------------------------------------------------------------------------------------------------------------------------------------------------------------------------------------------------|
| Population estimate        | <a href="https://www.ers.usda.gov/data-products/county-level-data-sets/download-data/">https://www.ers.usda.gov/data-products/county-level-data-sets/download-data/</a> | Population estimate 2019                                                                                                                                                                                                                     |
| Population change          | <a href="https://www.ers.usda.gov/data-products/county-level-data-sets/download-data/">https://www.ers.usda.gov/data-products/county-level-data-sets/download-data/</a> | Number of population change 2019                                                                                                                                                                                                             |
| Births                     | <a href="https://www.ers.usda.gov/data-products/county-level-data-sets/download-data/">https://www.ers.usda.gov/data-products/county-level-data-sets/download-data/</a> | Birth rate 2019                                                                                                                                                                                                                              |
| Deaths                     | <a href="https://www.ers.usda.gov/data-products/county-level-data-sets/download-data/">https://www.ers.usda.gov/data-products/county-level-data-sets/download-data/</a> | Death rate 2019                                                                                                                                                                                                                              |
| Natural increase           | <a href="https://www.ers.usda.gov/data-products/county-level-data-sets/download-data/">https://www.ers.usda.gov/data-products/county-level-data-sets/download-data/</a> | Natural increase rate 2019                                                                                                                                                                                                                   |
| International migration    | <a href="https://www.ers.usda.gov/data-products/county-level-data-sets/download-data/">https://www.ers.usda.gov/data-products/county-level-data-sets/download-data/</a> | International migration rate 2019                                                                                                                                                                                                            |
| Domestic migration         | <a href="https://www.ers.usda.gov/data-products/county-level-data-sets/download-data/">https://www.ers.usda.gov/data-products/county-level-data-sets/download-data/</a> | Domestic migration rate 2019                                                                                                                                                                                                                 |
| Net migration              | <a href="https://www.ers.usda.gov/data-products/county-level-data-sets/download-data/">https://www.ers.usda.gov/data-products/county-level-data-sets/download-data/</a> | Net migration rate 2019                                                                                                                                                                                                                      |
| Residual                   | <a href="https://www.ers.usda.gov/data-products/county-level-data-sets/download-data/">https://www.ers.usda.gov/data-products/county-level-data-sets/download-data/</a> | Residual 2019                                                                                                                                                                                                                                |
| Rural-urban continuum code | <a href="https://www.ers.usda.gov/data-products/county-level-data-sets/download-data/">https://www.ers.usda.gov/data-products/county-level-data-sets/download-data/</a> | The 2013 Rural-Urban Continuum Codes form a classification scheme that distinguishes metropolitan counties by the population size of their metro area, and nonmetropolitan counties by degree of urbanization and adjacency to a metro area. |
| Urban influence code       | <a href="https://www.ers.usda.gov/data-products/county-level-data-sets/download-data/">https://www.ers.usda.gov/data-products/county-level-data-sets/download-data/</a> | The 2013 Urban Influence Codes form a classification scheme that distinguishes metropolitan counties by population size of their metro area, and nonmetropolitan counties by size of                                                         |

|                                                  |                                                                                                                                                                         |                                                                         |
|--------------------------------------------------|-------------------------------------------------------------------------------------------------------------------------------------------------------------------------|-------------------------------------------------------------------------|
|                                                  |                                                                                                                                                                         | the largest city or town and proximity to metro and micropolitan areas. |
| White alone                                      | <a href="https://covid19.census.gov/datasets/">https://covid19.census.gov/datasets/</a>                                                                                 | Number of Total Population                                              |
| Black or African American alone                  | <a href="https://covid19.census.gov/datasets/">https://covid19.census.gov/datasets/</a>                                                                                 | Number of Total Population                                              |
| American Indian and Alaska Native alone          | <a href="https://covid19.census.gov/datasets/">https://covid19.census.gov/datasets/</a>                                                                                 | Number of Total Population                                              |
| Asian alone                                      | <a href="https://covid19.census.gov/datasets/">https://covid19.census.gov/datasets/</a>                                                                                 | Number of Total Population                                              |
| Native Hawaiian and other Pacific Islander alone | <a href="https://covid19.census.gov/datasets/">https://covid19.census.gov/datasets/</a>                                                                                 | Number of Total Population                                              |
| Some other race alone                            | <a href="https://covid19.census.gov/datasets/">https://covid19.census.gov/datasets/</a>                                                                                 | Number of Total Population                                              |
| Two or more races                                | <a href="https://covid19.census.gov/datasets/">https://covid19.census.gov/datasets/</a>                                                                                 | Number of Total Population                                              |
| Not Hispanic or Latino                           | <a href="https://covid19.census.gov/datasets/">https://covid19.census.gov/datasets/</a>                                                                                 | Number of Total Population                                              |
| Hispanic or Latino (of any race)                 | <a href="https://covid19.census.gov/datasets/">https://covid19.census.gov/datasets/</a>                                                                                 | Number of Total Population                                              |
| Nursery, preschool                               | <a href="https://covid19.census.gov/datasets/">https://covid19.census.gov/datasets/</a>                                                                                 | Number of Population Enrollment in                                      |
| Kindergarten                                     | <a href="https://covid19.census.gov/datasets/">https://covid19.census.gov/datasets/</a>                                                                                 | Number of Population Enrollment in                                      |
| Grade 1-4                                        | <a href="https://covid19.census.gov/datasets/">https://covid19.census.gov/datasets/</a>                                                                                 | Number of Population Enrollment in                                      |
| Grade 5-8                                        | <a href="https://covid19.census.gov/datasets/">https://covid19.census.gov/datasets/</a>                                                                                 | Number of Population Enrollment in                                      |
| Grade 9-12                                       | <a href="https://covid19.census.gov/datasets/">https://covid19.census.gov/datasets/</a>                                                                                 | Number of Population Enrollment in                                      |
| College                                          | <a href="https://covid19.census.gov/datasets/">https://covid19.census.gov/datasets/</a>                                                                                 | Number of Population Enrollment in                                      |
| Grad/Prof                                        | <a href="https://covid19.census.gov/datasets/">https://covid19.census.gov/datasets/</a>                                                                                 | Number of Population Enrollment in                                      |
| Elementary school (grades 1-8)                   | <a href="https://covid19.census.gov/datasets/">https://covid19.census.gov/datasets/</a>                                                                                 | Number of Population Enrollment in                                      |
| High school (grades 9-12)                        | <a href="https://covid19.census.gov/datasets/">https://covid19.census.gov/datasets/</a>                                                                                 | Number of Population Enrollment in                                      |
| College or graduate school                       | <a href="https://covid19.census.gov/datasets/">https://covid19.census.gov/datasets/</a>                                                                                 | Number of Population Enrollment in                                      |
| Total households                                 | <a href="https://covid19.census.gov/datasets/">https://covid19.census.gov/datasets/</a>                                                                                 | Number of Total Households                                              |
| Civilian labor force                             | <a href="https://www.ers.usda.gov/data-products/county-level-data-sets/download-data/">https://www.ers.usda.gov/data-products/county-level-data-sets/download-data/</a> | Number, 2019                                                            |
| Employed                                         | <a href="https://www.ers.usda.gov/data-products/county-level-data-sets/download-data/">https://www.ers.usda.gov/data-products/county-level-data-sets/download-data/</a> | Rate 2019                                                               |
| Unemployed                                       | <a href="https://www.ers.usda.gov/data-products/county-level-data-sets/download-data/">https://www.ers.usda.gov/data-products/county-level-data-sets/download-data/</a> | Rate 2019                                                               |
| Median household income                          | <a href="https://www.ers.usda.gov/data-products/county-level-data-sets/download-data/">https://www.ers.usda.gov/data-products/county-level-data-sets/download-data/</a> | Number, 2019                                                            |

|                                                |                                                                                                                                                                         |                                                               |
|------------------------------------------------|-------------------------------------------------------------------------------------------------------------------------------------------------------------------------|---------------------------------------------------------------|
| Median household income percent of state total | <a href="https://www.ers.usda.gov/data-products/county-level-data-sets/download-data/">https://www.ers.usda.gov/data-products/county-level-data-sets/download-data/</a> | Number, 2020                                                  |
| Votes difference                               | <a href="https://github.com/tonmcg/US_County_Level_Election_Results_08-20">https://github.com/tonmcg/US_County_Level_Election_Results_08-20</a>                         | Absolute difference between Republican votes - Democrat votes |
| Estimated percent of people in poverty         | <a href="https://www.ers.usda.gov/data-products/county-level-data-sets/download-data/">https://www.ers.usda.gov/data-products/county-level-data-sets/download-data/</a> | Estimated percent of people of all ages in poverty 2018       |

**Supplementary Figure S1** Color-coded comparison of top five most frequently selected features of the four prediction scenarios covered for spatial analysis of case and death counts during initial and nationwide COVID- 19 pandemics.

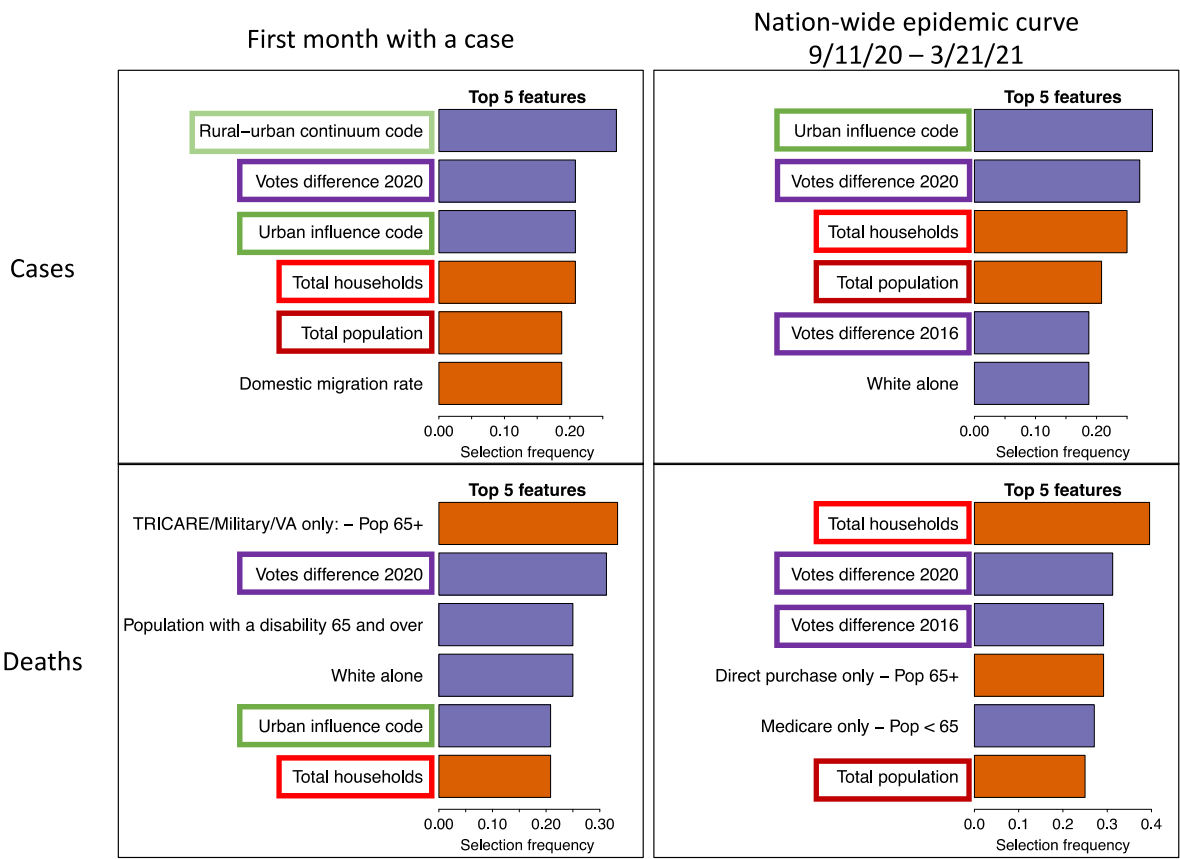

*Supplementary Figure S1 Color-coded comparison of top five most frequently selected features of the four prediction scenarios covered for spatial analysis of case and death counts during initial and nationwide COVID- 19 pandemics.*

**Supplementary Figure S2** (a-b) Topic distributions versus cases and deaths during initial phase, respectively (c-d) Topic distributions versus cases and deaths during nationwide phase, respectively.

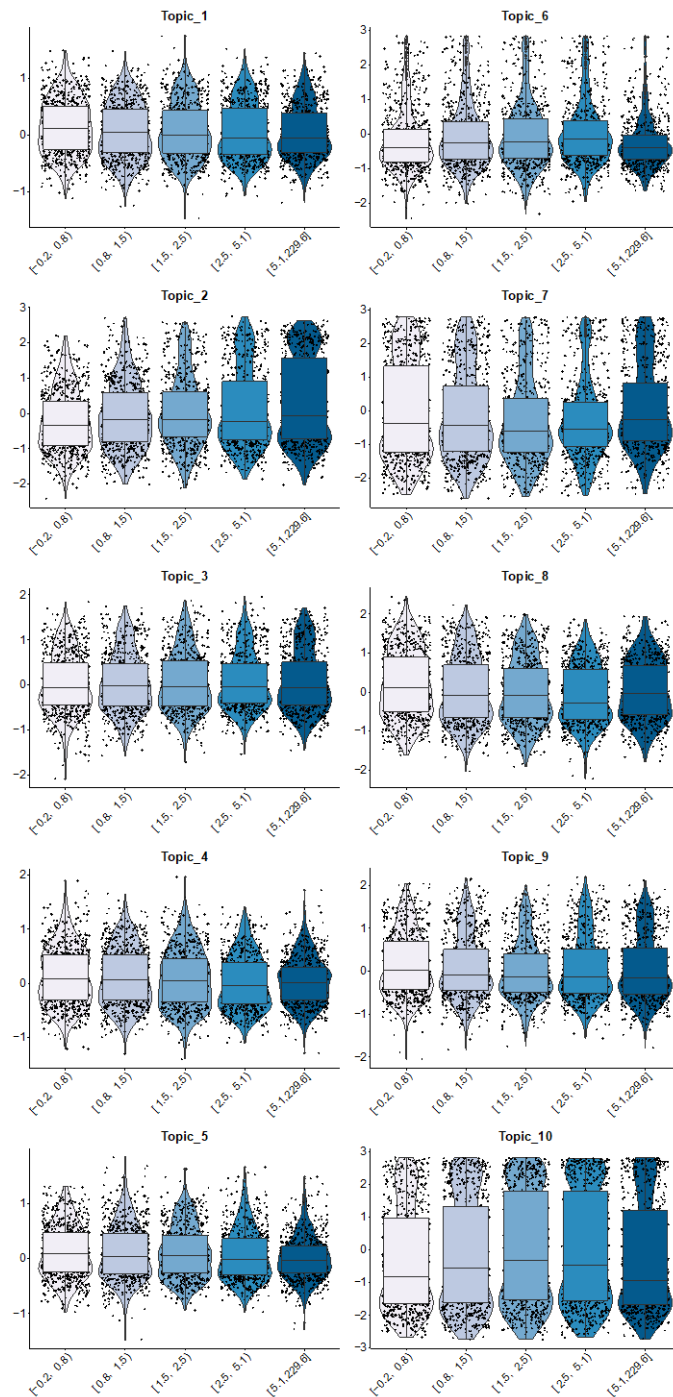

(a)

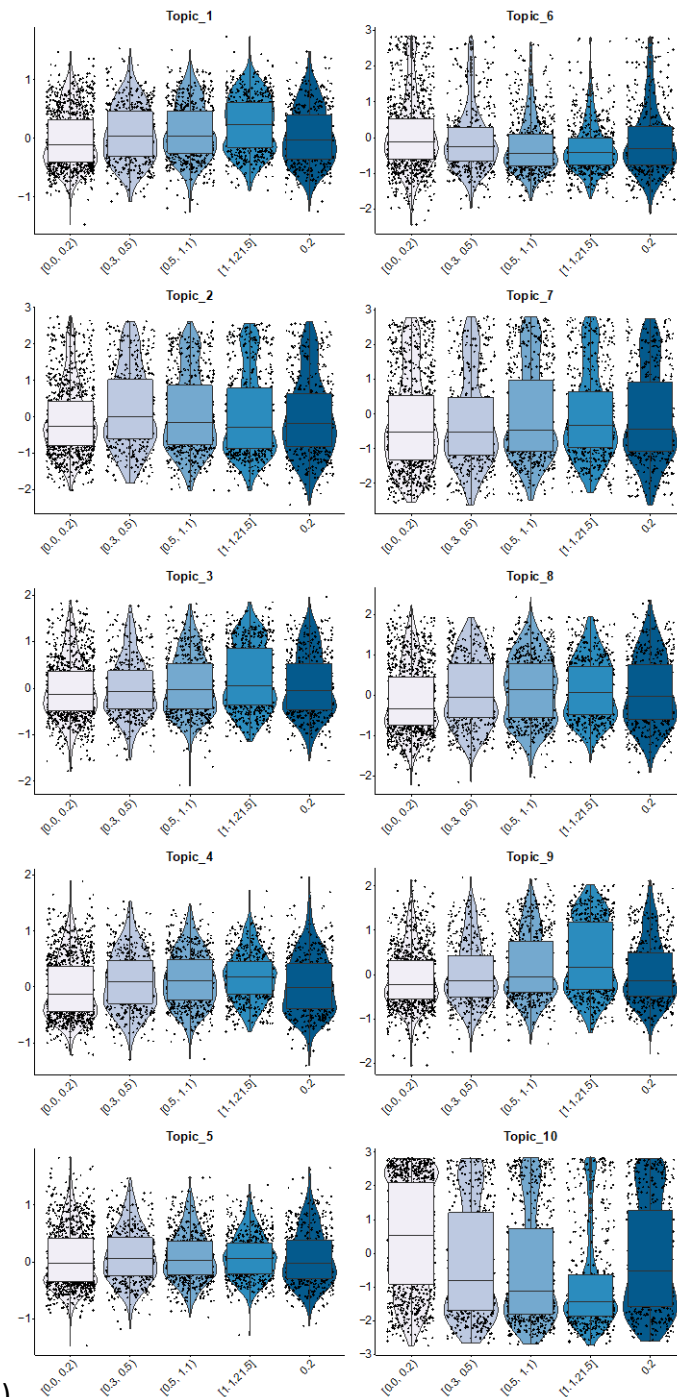

(b)

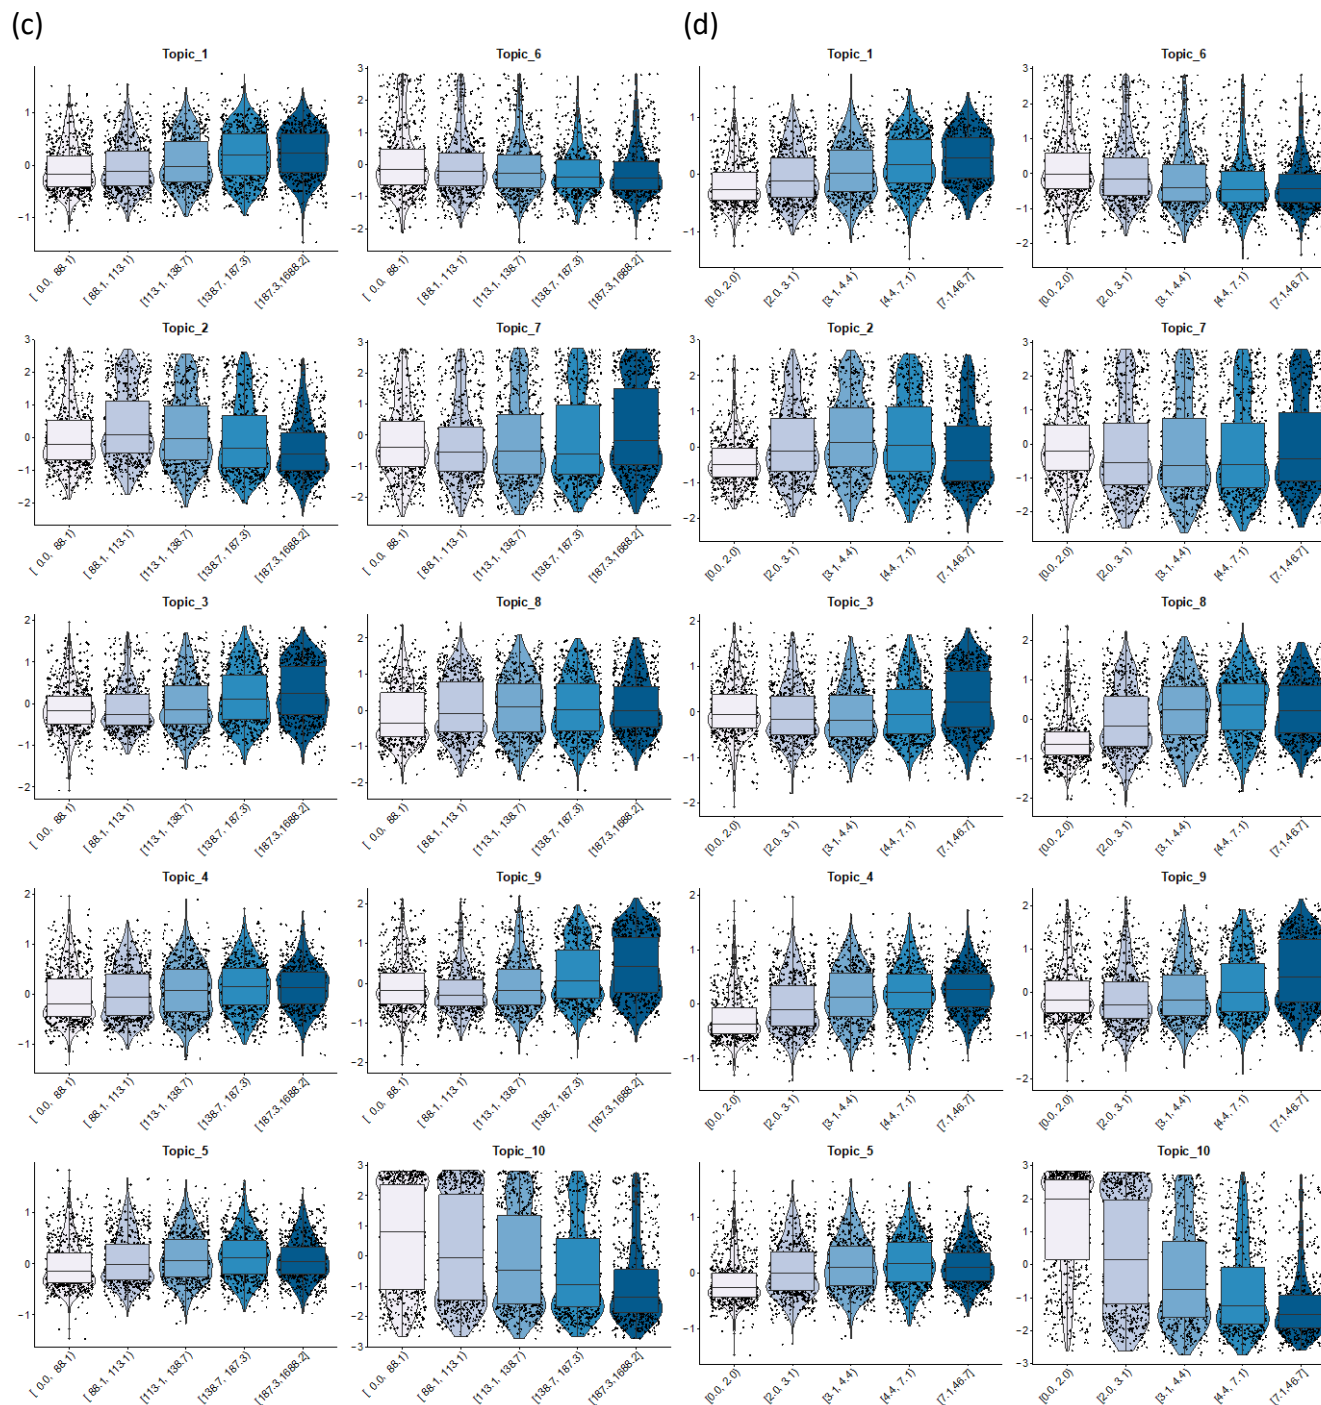

Supplementary Figure S2 (a-b) Topic distributions versus cases and deaths during initial phase, respectively (c-d) Topic distributions versus cases and deaths during nationwide phase, respectively.
